# Supplementary material for: Development of Glycosylation-Modified DPPA-1 Compounds as Innovative PD-1/PD-L1 Blockers: Design, Synthesis, and Biological Evaluation
Source: MDPI journal article supplement (doi:10.3390/molecules29081898), 2024-04-22
Supplement: s1 [file s1]

# MASS SPECTROMETRY REPORT

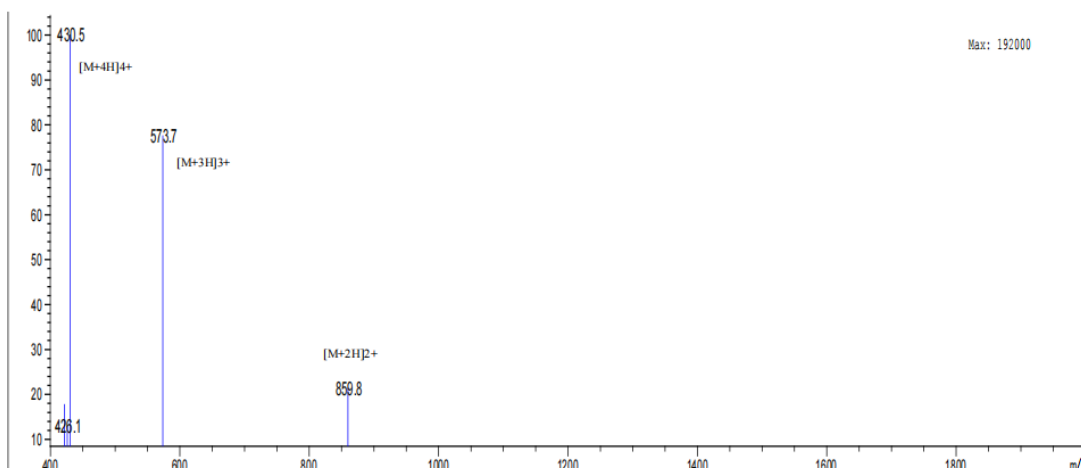

|                    |                            |                     |               |                         |
|--------------------|----------------------------|---------------------|---------------|-------------------------|
| Sample Description |                            | Instrument          | Agilent-6125B |                         |
| Analyzed date:     | 2022-02-08                 | Probe:              | ESI           | Probe Bias: +4.5kv      |
| Analyst:           | YU                         | Nebulizer Gas Flow: | 1.5L/min      | Detector: 1.5kv         |
| Sample:            | Glucose-NYSKPTDRQYHF NF-12 | CDL:                | -20.0v        | T. Flow: 0.2ml/min      |
| M.W.:              | 1717.64                    | CDL Temp.:          | 250 °C        | B. Conc.: 50%H2O/50%ACN |
| Lot. No.:          | P211213-HS957668           | Block Temp.:        | 200 °C        |                         |

# MASS SPECTROMETRY REPORT

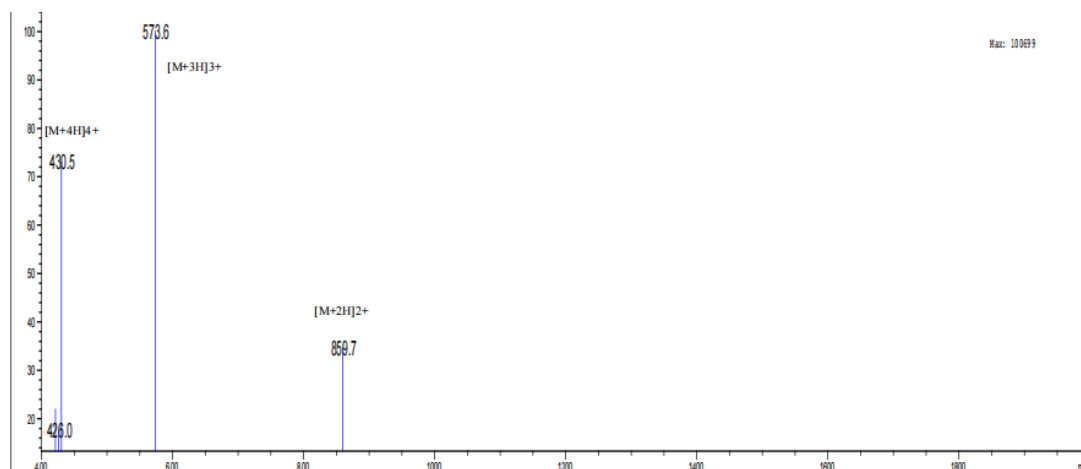

|                    |                         |                     |                |                         |
|--------------------|-------------------------|---------------------|----------------|-------------------------|
| Sample Description |                         | Instrument          | Agilent-6125 B |                         |
| Analyzed date:     | 2022-02-10              | Probe:              | ESI            | Probe Bias: +4.5kv      |
| Analyst:           | YU                      | Nebulizer Gas Flow: | 1.5L/min       | Detector: 1.5kv         |
| Sample:            | Gala-NYSKPTDRQYHF NF-12 | CDL:                | -20.0v         | T. Flow: 0.2ml/min      |
| M.W.:              | 1717.64                 | CDL Temp.:          | 250 °C         | B. Conc.: 50%H2O/50%ACN |
| Lot. No.:          | P211213-HS957669        | Block Temp.:        | 200 °C         |                         |
